# Supplementary material
Source: PubMed Central journal article supplement (PMC5552047)
Supplement: NIHMS888049-supplement-Supplement.pdf [file NIHMS888049-supplement-Supplement.pdf]

**Supplementary Table 1.** Odds ratios for mortality five years post-diagnosis among UADT cancer cases according to intake of sugars from beverages (grams)<sup>a</sup>

|    | SB1 <sup>b</sup> |                    |                | SB2 <sup>c</sup> |                    |                |
|----|------------------|--------------------|----------------|------------------|--------------------|----------------|
|    | Dead/All         | aOR (95% CI)       | P <sup>d</sup> | Dead/All         | aOR (95% CI)       | P <sup>d</sup> |
| Q1 | 38/155           | 1.0                |                | 40/139           | 1.0                |                |
| Q2 | 52/141           | 1.09 (0.80 - 1.50) |                | 45/157           | 0.82 (0.57 - 1.07) |                |
| Q3 | 44/122           | 1.35 (0.96 - 1.89) |                | 58/148           | 1.25 (0.92 - 1.69) |                |
| Q4 | 70/171           | 1.20 (0.88 - 1.63) | 0.007          | 61/145           | 1.27 (0.93 - 1.75) | 0.04           |

<sup>a</sup>Adjusted for gender, race, age, smoking pack-years, alcohol drinking, education, caloric intake, tumor grade, and pathology

<sup>b</sup>SB1=Sugars from soft drinks and fruit juices (grams/day)

<sup>c</sup>SB2=Sugars from soft drinks, fruit juices, and sugar added to tea, coffee or cereal (grams/day)

<sup>d</sup>P-value for trend

**Supplementary Table 2.** Hazard ratios for overall mortality among UADT cancer cases according to consumption of sugars from beverages (complete case analysis)<sup>a)</sup><sup>b)</sup>

|                       | <b>SB1<sup>c)</sup></b> |                    |                 | <b>SB2<sup>d)</sup></b> |                    |                 |
|-----------------------|-------------------------|--------------------|-----------------|-------------------------|--------------------|-----------------|
|                       | Dead/All                | aHR (95% CI)       | P <sup>e)</sup> | Dead/All                | aHR (95% CI)       | P <sup>e)</sup> |
| <b>Sugar Grams</b>    |                         |                    |                 |                         |                    |                 |
| Q1                    | 32/112                  | 1.0                |                 | 34/113                  | 1.0                |                 |
| Q2                    | 50/114                  | 1.89 (1.21 - 2.97) |                 | 42/112                  | 1.32 (0.83 - 2.12) |                 |
| Q3                    | 36/96                   | 1.80 (1.11 - 2.96) |                 | 53/118                  | 1.70 (1.09 - 2.67) |                 |
| Q4                    | 67/134                  | 1.98 (1.27 - 3.09) | 0.007           | 56/113                  | 1.79 (1.13 - 2.67) | 0.007           |
| <b>Sugar Servings</b> |                         |                    |                 |                         |                    |                 |
| Q1                    | 28/100                  | 1.0                |                 | 28/100                  | 1.0                |                 |
| Q2                    | 49/114                  | 1.95 (1.22 - 3.12) |                 | 49/114                  | 0.90 (0.56 - 1.47) |                 |
| Q3                    | 53/127                  | 1.90 (1.18 - 3.06) |                 | 53/127                  | 1.19 (0.77 - 1.84) |                 |
| Q4                    | 55/115                  | 2.08 (1.29 - 3.36) | 0.006           | 55/115                  | 1.45 (0.94 - 2.25) | 0.05            |

<sup>a)</sup> All cases with complete information on caloric intake included

<sup>b)</sup> Adjusted for gender, race, age, smoking pack-years, alcohol drinking, education, caloric intake, tumor grade, and pathology

<sup>c)</sup> SB1=Sugars from soft drinks and fruit juices (grams/day)

<sup>d)</sup> SB2=Sugars from soft drinks, fruit juices, and sugar added to tea, coffee or cereal (grams/day)

<sup>e)</sup> P-value for trend
